# Supplementary material for: The Role of Alternative Electron Pathways for Effectiveness of Photosynthetic Performance of Arabidopsis thaliana, Wt and Lut2, under Low Temperature and High Light Intensity
Source: MDPI journal article supplement (doi:10.3390/plants11172318), 2022-09-04
Supplement: s1 [file s1]

The role of alternative electron pathways for effectiveness of photosynthetic performance of *Arabidopsis thaliana*, wt and *lut2*, under low temperature at high light

Antoaneta V. Popova<sup>1</sup>, Martin Stefanov<sup>1</sup>, Alexander G. Ivanov<sup>1,2</sup>, Maya Velitchkova<sup>1</sup>

Supplementary Figure S1

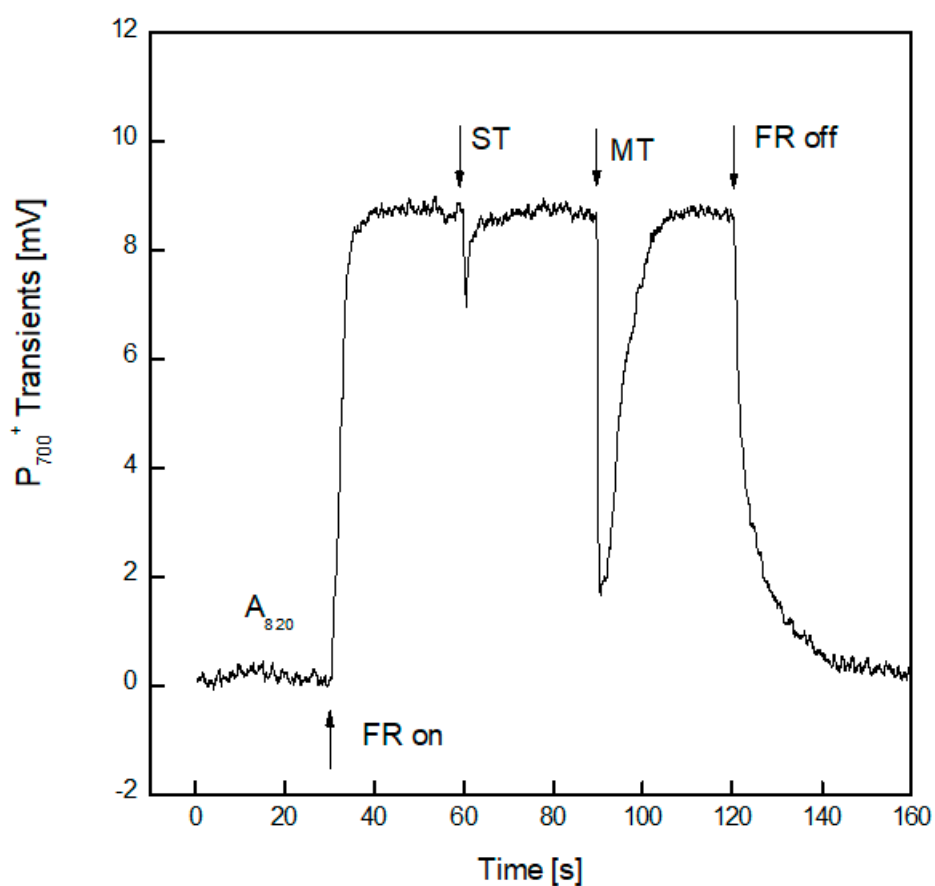

**Figure S1.** Typical trace of far red (FR)-induced P<sub>700</sub> transients measured at 820 nm. FR light is inducing oxidation of P<sub>700</sub> (P<sub>700</sub><sup>+</sup>). At the steady state of oxidation, a single-turnover (ST) and multiple-turnover (MT) flashes of white saturating light were applied.
